# Supplementary figures and images for: Tandem riboswitches form a natural Boolean logic gate to control purine metabolism in bacteria
Source: eLife journal article supplement (doi:10.7554/elife.33908), 2018-03-05

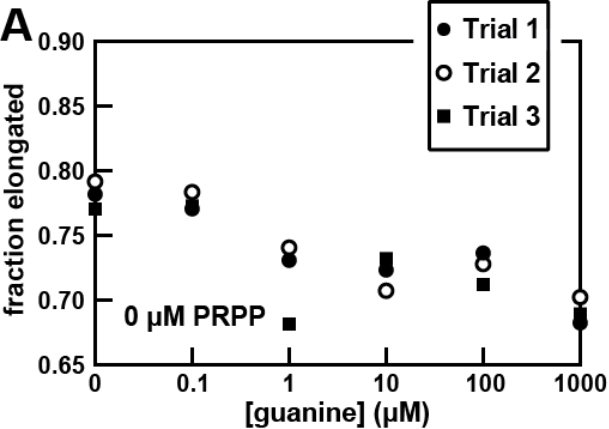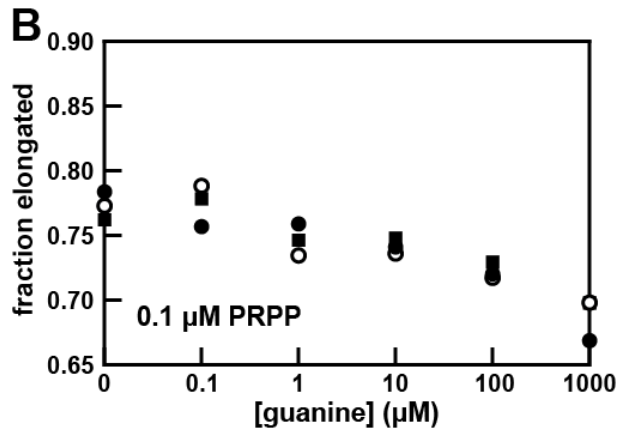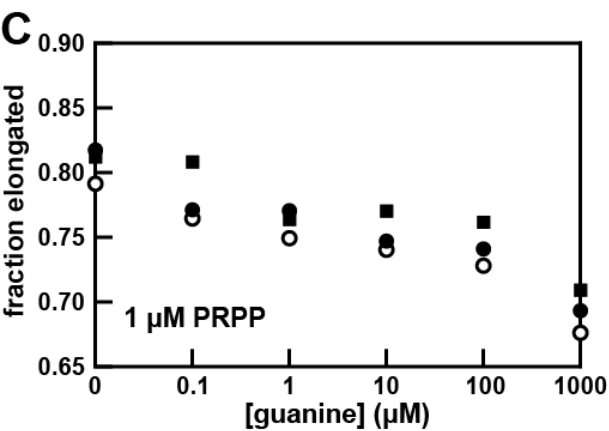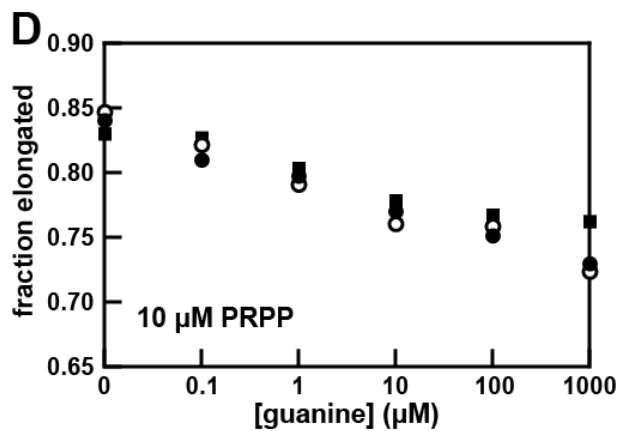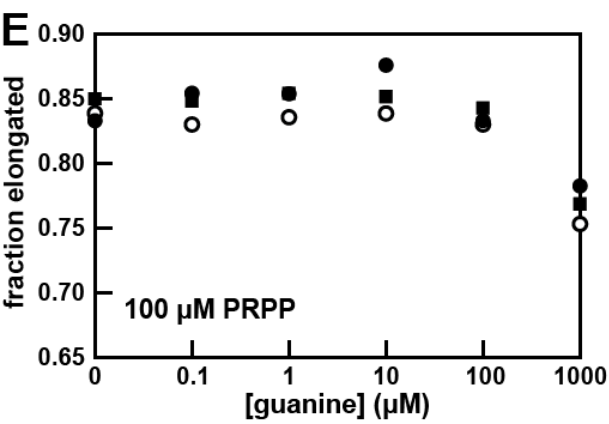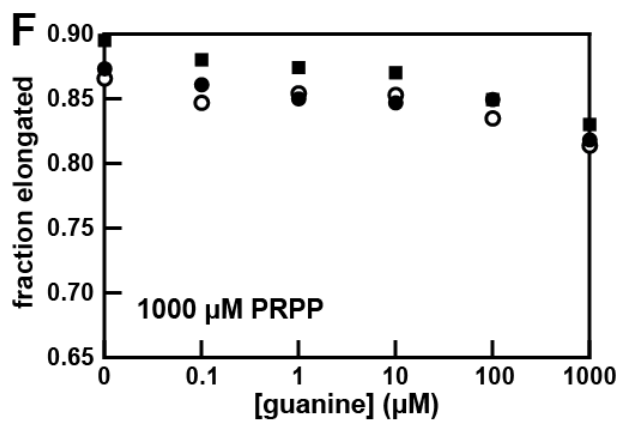

Supplement: supp [file elife_poa_e33908_Figure_5_figure_supplement_1.pdf › elife_poa_e33908_Figure_5_figure_supplement_1.pdf]
